# Supplementary material for: Boron-decorated C9N4 monolayers as promising metal-free catalysts for electrocatalytic nitrogen reduction reaction: a first-principles study
Source: Royal Society of Chemistry journal article supplement (doi:10.1039/c9nj04792a), 2019-11-28
Supplement: c9nj04792a1.pdf [file c9nj04792a1.pdf]

**Boron-decorated C<sub>9</sub>N<sub>4</sub> monolayers as promising metal-free catalysts for  
electrocatalytic nitrogen reduction reaction: A first-principle study**

Jing Zhang,<sup>a</sup> Yameng Zhao,<sup>ab</sup> Zhi Wang,<sup>a</sup> Gui Yang,<sup>a</sup> Junlong Tian,<sup>a</sup> Dongwei Ma<sup>a</sup> and  
Yuanxu Wang<sup>\*b</sup>

*<sup>a</sup>School of Physics, Anyang Normal University, Anyang 455000, China*

*<sup>b</sup>Institute for Computational Materials Science, School of Physics and  
Electronics, Henan University, Kaifeng 475004, China*

## **Electronic Supplementary Information**

---

\*Corresponding author. E-mail: [wangyx@henu.edu.cn](mailto:wangyx@henu.edu.cn) (Yuanxu Wang).

Table S1. Calculated zero-point energy and entropy of different adsorption species along the alternating pathway for NRR on B-C<sub>9</sub>N<sub>4</sub>, where \* denotes the adsorption site.

| <b>Species</b>                        | <b><i>E</i><sub>ZPE</sub> (eV)</b> | <b><i>TS</i> (eV)</b> |
|---------------------------------------|------------------------------------|-----------------------|
| <b>N<sub>2</sub></b>                  | 0.15                               | 0.58                  |
| <b>*N≡N</b>                           | 0.23                               | 0.11                  |
| <b>*N=NH</b>                          | 0.51                               | 0.15                  |
| <b>*NH=NH</b>                         | 0.87                               | 0.10                  |
| <b>*NH-NH<sub>2</sub></b>             | 1.20                               | 0.12                  |
| <b>*NH<sub>2</sub>-NH<sub>2</sub></b> | 1.50                               | 0.14                  |
| <b>*NH<sub>2</sub>-NH<sub>3</sub></b> | 1.70                               | 0.33                  |
| <b>*N-NH<sub>2</sub></b>              | 0.84                               | 0.12                  |
| <b>*N-NH<sub>3</sub></b>              | 1.19                               | 0.11                  |
| <b>*N</b>                             | 0.08                               | 0.06                  |
| <b>*NH</b>                            | 0.38                               | 0.07                  |
| <b>*NH<sub>2</sub></b>                | 0.74                               | 0.06                  |
| <b>*NH<sub>3</sub></b>                | 1.04                               | 0.07                  |
| <b>NH<sub>3</sub></b>                 | 0.89                               | 0.06                  |

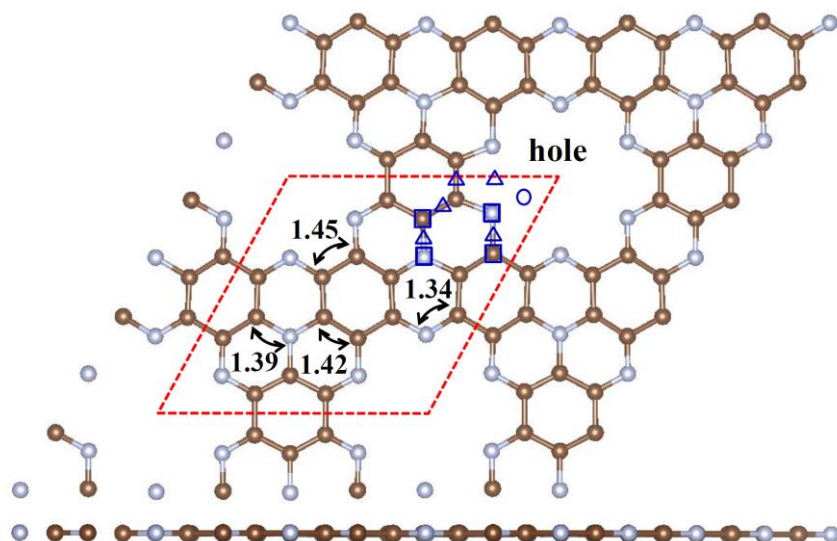

Fig. S1. Top and side views of the pristine (2×2)  $C_9N_4$  monolayer, where the unit cell is enclosed by the red lines. The brown and silvery balls represent C and N atoms, respectively. The key bond lengths (in Å) are also given.

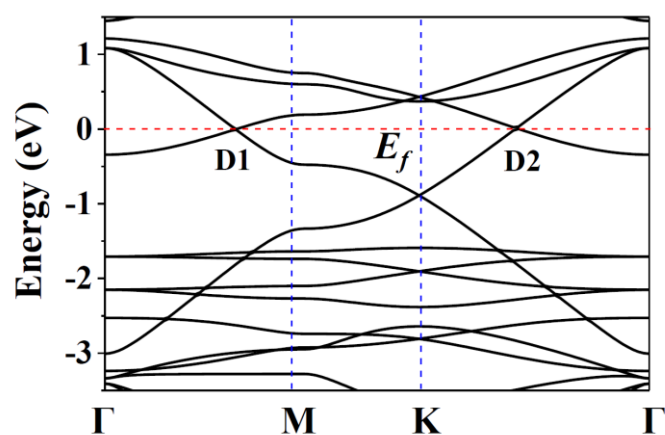

Fig. S2. Band structure of the pristine  $C_9N_4$  monolayer unit cell. The horizontal dashed line denotes the position of Fermi level.

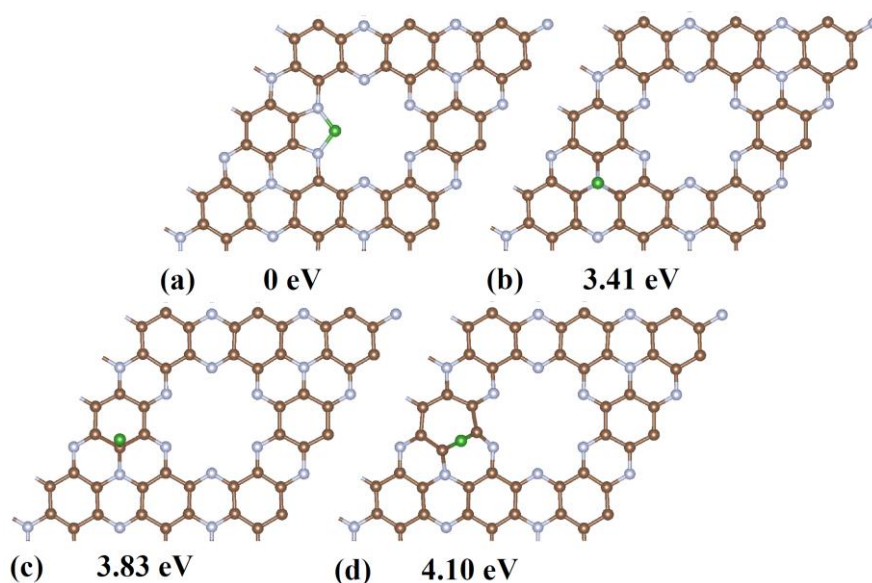

Fig. S3. Top views of the four stable B-C<sub>9</sub>N<sub>4</sub> and their relative energies.

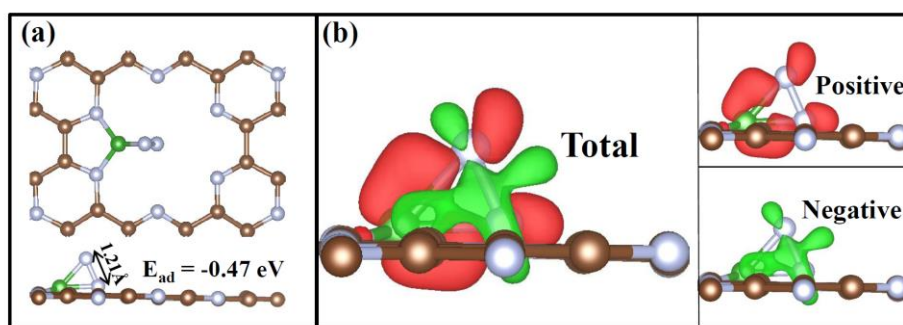

Fig. S4. (a) Top and side views of B-C<sub>9</sub>N<sub>4</sub> with the adsorbed N<sub>2</sub> on the side-on pattern, where the adsorption energy and bond length of N<sub>2</sub> are shown. (b) Charge density difference of B-C<sub>9</sub>N<sub>4</sub> with the adsorbed N<sub>2</sub> via the side-on pattern. The red and green regions represent the areas of electron accumulation and depletion, respectively. The isosurfaces are taken as 0.005 e/bohr<sup>3</sup>.
